# Supplementary material for: GATOR1-dependent recruitment of FLCN–FNIP to lysosomes coordinates Rag GTPase heterodimer nucleotide status in response to amino acids
Source: PubMed Central journal article supplement — J Cell Biol. 2018 Aug 6;217(8):2765–76. doi: 10.1083/jcb.201712177 (PMC6080935; doi:10.1083/jcb.201712177), 2018-08-06
Supplement: JCB_201712177_sm.pdf [file JCB_201712177_sm.pdf]

## Supplemental material

Meng and Ferguson, <https://doi.org/10.1083/jcb.201712177>

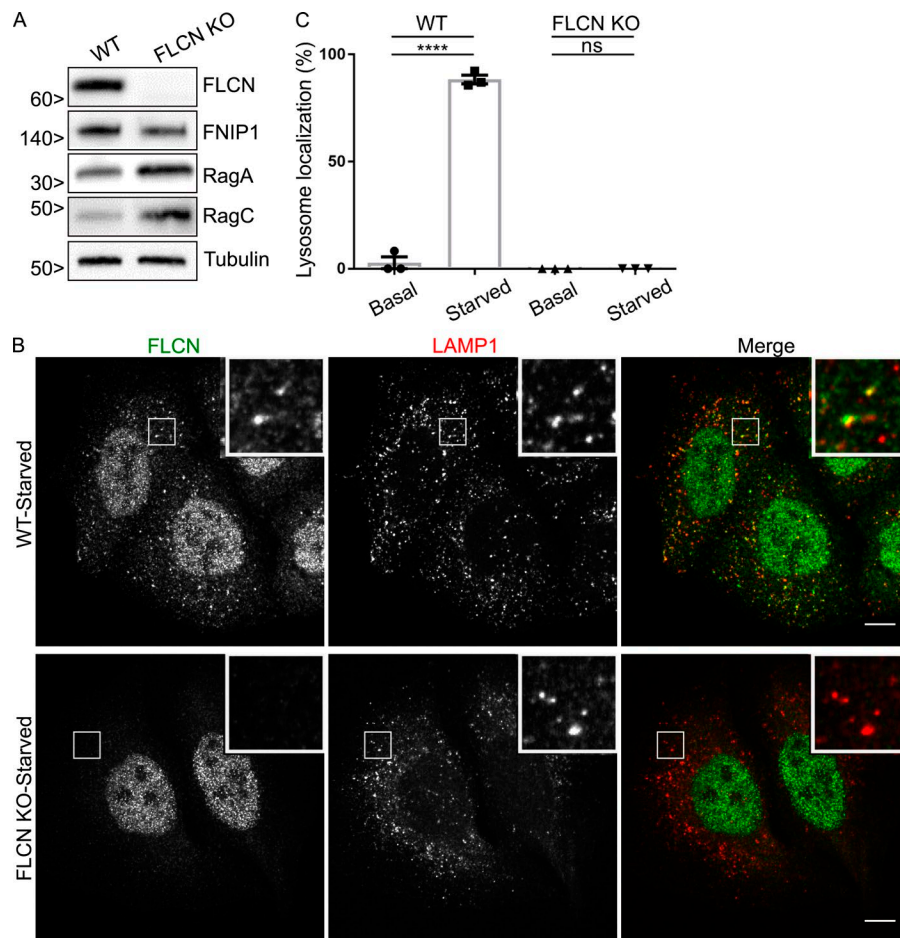

Figure S1. **Analysis of *FLCN* KO cells demonstrates anti-*FLCN* antibody specificity.** (A) Representative immunoblots of WT and *FLCN* KO HeLa cells. Molecular masses are given in kilodaltons. (B) Anti-*FLCN* immunofluorescent staining of WT versus *FLCN* KO cells that were starved for 2 h before fixation reveals selective loss of diffuse cytoplasmic and punctate (lysosome) signal in the *FLCN* KO cells. In contrast, a nonspecific nuclear signal was present in cells of both genotypes. (C) Quantification of percentage of cells with five or more *FLCN* spots that are positive for LAMP1 signal (mean  $\pm$  SEM;  $n = 3$  experiments; 57–63 cells per condition). \*\*\*\*,  $P < 0.0001$ ; ANOVA with Bonferroni's post hoc test. Bars, 10  $\mu\text{m}$ . Insets are 7.8  $\mu\text{m}$  wide.

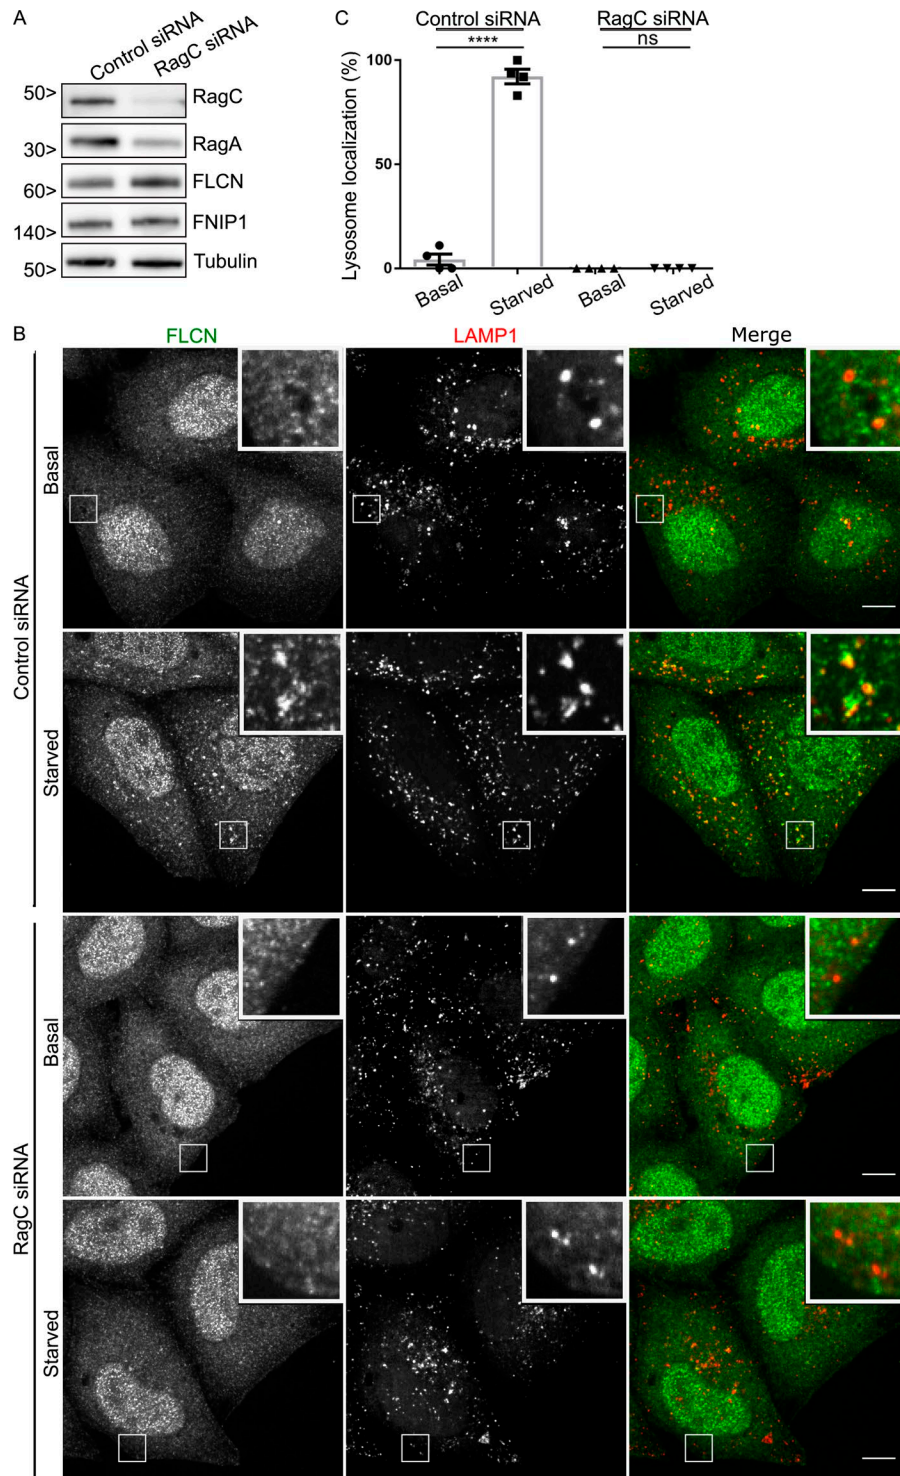

Figure S2. **Regulation of the lysosomal recruitment of FLCN by amino acid availability and Rag GTPases.** (A) Immunoblot analysis of the endogenous FLCN, FNIP1, RagA, RagC, and tubulin proteins in control conditions or after RagC knockdown. Molecular masses are given in kilodaltons. (B) Representative immunofluorescence experiment showing the effect of starvation in control conditions or after RagC knockdown. (C) Quantification of percentage of cells with five or more FLCN spots that are LAMP1-positive (mean  $\pm$  SEM;  $n = 4$  experiments; 61–77 cells per condition; \*\*\*\*,  $P < 0.0001$ ; ANOVA with Bonferroni's post hoc test). Bars, 10  $\mu$ m. Insets are 7.8  $\mu$ m wide.

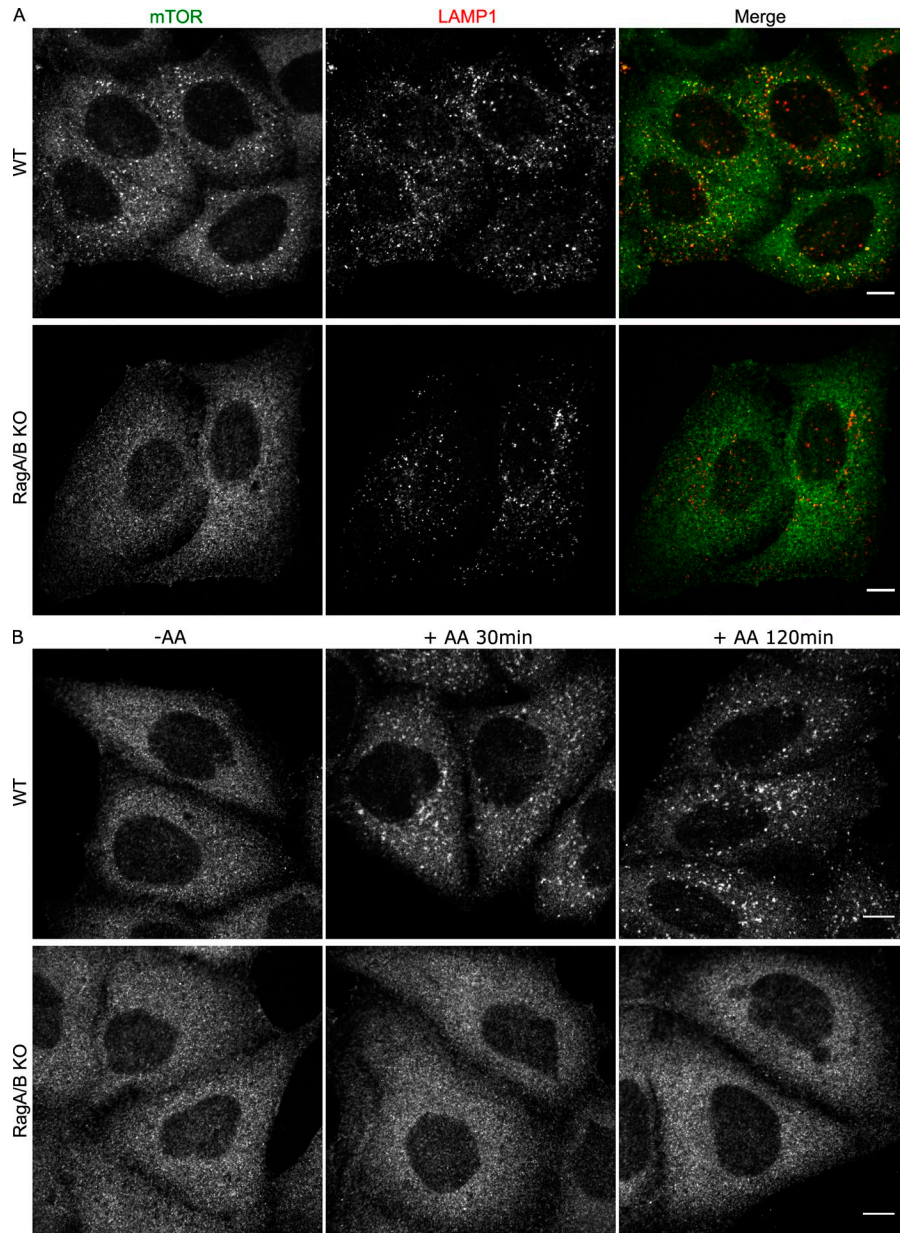

Figure S3. **mTOR lysosome localization in response to amino acids is defective in the absence of RagA and RagB.** (A) Immunofluorescence analysis showing mTOR and LAMP1 in WT and *RagA/B* KO HeLa cells under basal growth conditions. (B) Immunofluorescence analysis depicting mTOR and LAMP1 in WT and *RagA/B* KO cells that were starved of amino acids (AA) and then stimulated with amino acids after the indicated time. Bars, 10  $\mu$ m.

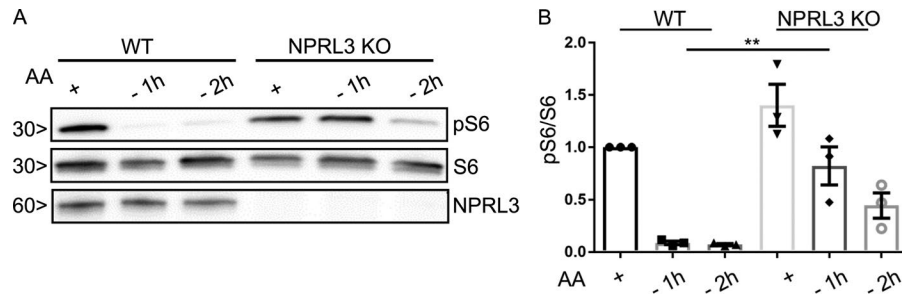

Figure S4. **mTORC1 signaling is resistant to amino acid starvation in NPRL3 KO cells.** (A and B) Representative Western blots (A) and quantification (B) showing the phosphorylation of reporters of mTORC1 activity in WT and NPRL3 KO cells upon starvation (1 h and 2 h). \*\*,  $P < 0.01$ ; ANOVA with Bonferroni's post hoc test. Molecular masses are given in kilodaltons. AA, amino acid.

Table S1. **Characterization of FLCN KO, RagA/B KO, NPRL3 KO, and 2×HA-FNIP1 knock-in cell lines**

| Gene  | Mutation         |
|-------|------------------|
| FLCN  | 11 bp deletion   |
|       | 2 bp deletion    |
|       | 1 bp insertion   |
| RagA  | 2 bp deletion    |
|       | 102 bp insertion |
| RagB  | 11 bp deletion   |
|       | 13 bp deletion   |
|       | 1 bp deletion    |
| NPRL3 | 2 bp deletion    |
|       | 1 bp deletion    |
|       | 4 bp deletion    |
| FNIP1 | 2 bp deletion    |
|       | 2×HA insertion   |

Table S2. **Oligonucleotide sequences for gene-editing experiments**

| Gene  | Use                          | Sense (5'-3')                                                                                                                                                                                                   | Antisense (5'-3')          |
|-------|------------------------------|-----------------------------------------------------------------------------------------------------------------------------------------------------------------------------------------------------------------|----------------------------|
| FLCN  | Guide RNA for KO             | CACCGTCTCAGCAAGTACGAGTTTG                                                                                                                                                                                       | AAACCAAACCTCGTACTTGCTGAGAC |
| FNIP1 | crRNA for 2×HA tag insertion | GAGCUUCUGGAACAGCGUAGGUUUUAGAG                                                                                                                                                                                   | -                          |
| FNIP1 | 2×HA tag template            | GCGCCCATGGGGTGGCGGGGGCGGCTGTAG<br>GAGCAGGGGCCTAGCAAGCGCCAGCGGAG<br>CGACCCCTGCCTGGCCGTGGCTAGCATGGC<br>CTACCCATACGATGTTCCAGATTACGCTTA<br>CCCATACGATGTTCCAGATTACGCTCCTAC<br>GCTGTTCCAGAAGCTCTTCAGCAAGAGGAC<br>CGGC | -                          |
| NPRL3 | Guide RNA for KO             | CACCGGAACACGCCGACGTGCAC                                                                                                                                                                                         | AAACGTGCACGTCGGGCGTAGTTCC  |
| RagA  | Guide RNA for KO             | CACCGATTACATTGCTCGGACACC                                                                                                                                                                                        | AAACGGTGTGCGGAGCAATGTAATC  |
| RagB  | Guide RNA for KO             | CACCGAATCCCACAGGTTCAATACC                                                                                                                                                                                       | AAACGGTATTGAACCTGTGGGATTC  |

Table S3. **Oligonucleotide primers for PCR amplification of genomic DNA**

| Target            | Sense (5'-3')             | Antisense (5'-3')         |
|-------------------|---------------------------|---------------------------|
| <i>2×HA-FNIP1</i> | CCGTGGCCGTTTGAAGTACTAATT  | AGCGCCCTACCTGAACCCGCAATCT |
| <i>FLCN</i>       | GTCTTTTCACCAGCAGCCTTCCCCA | CCACCACATCCACAGACAGGTTCTG |
| <i>NPRL3</i>      | GTGATCTTAAGAGATGCTCTCCTGC | AAGGGCCCAGGAGAAACCTGGGATT |
| <i>RagA</i>       | CGGTGATGCCAAATACAGCCATGA  | CAGTCCCACAGGTTCAGCACCAGGT |
| <i>RagB</i>       | CTTATTTTGAATTTCACTTCACCTG | ATCTATTACAAATGATAGTTACTCT |

Table S4. **Oligonucleotide primers for PCR amplification of HA-RagA cDNA**

| Type      | Sequence (5'-3')                                                                         |
|-----------|------------------------------------------------------------------------------------------|
| Sense     | TAGTACCGGTAGGCCTGTCGACGATGCCACCATGGGATATCCGTACGATGTCCAGACTATGCAGGTGGATCAGGAGTTCCAGGTGGAT |
| Antisense | AGGATCCAGCGGCCGCGGGCCCGATTCAACGCATAAGGAGACTGTGCTTG                                       |

Table S5. **Summary of antibodies used**

| Target protein | Source                    | Catalog no. |
|----------------|---------------------------|-------------|
| FLCN           | Cell Signaling Technology | 3697        |
| FNIP1          | Epitomics                 | EPNCIR107   |
| HA             | Cell Signaling Technology | 2367        |
| HA-HRP         | Roche                     | 12013819001 |
| LAMP1          | DSHB                      | H4A3        |
| mTOR           | Cell Signaling Technology | 2983        |
| NPRL3          | Sigma-Aldrich             | HPA011741   |
| Phospho-S6     | Cell Signaling Technology | 4858        |
| Phospho-S6K    | Cell Signaling Technology | 9234        |
| RagA           | Cell Signaling Technology | 4357        |
| RagC           | Cell Signaling Technology | 9480        |
| S6             | Cell Signaling Technology | 2217        |
| S6K            | Cell Signaling Technology | 9202        |
| Tubulin        | Sigma-Aldrich             | T5168       |
